# Supplementary material for: Amino-functionalization of large-pore mesoscopically ordered silica by a one-step hyperbranching polymerization of a surface-grown polyethyleneimine
Source: Royal Society of Chemistry journal article supplement (doi:10.1039/b607886a), 2006-01-01
Supplement: b607886a.pdf [file b607886a.pdf]

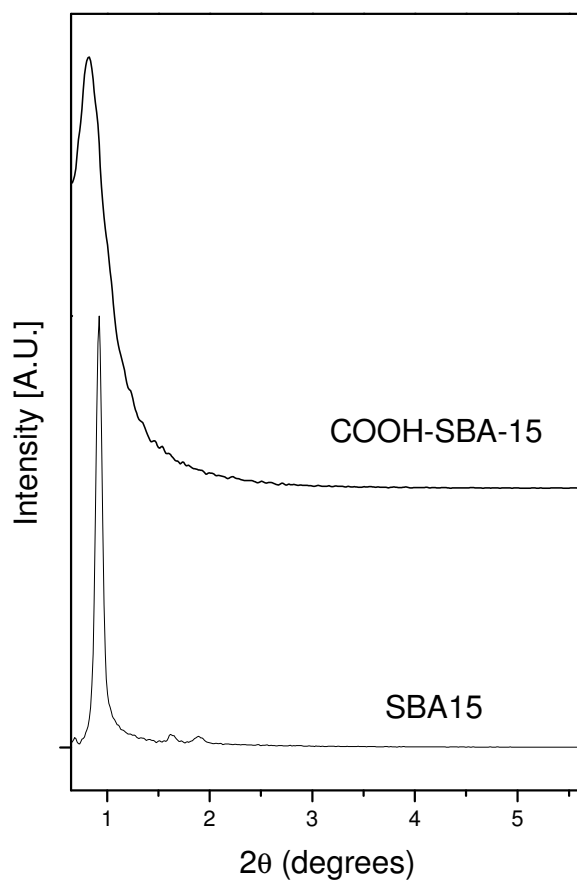

**Supplementary Fig. 1** PXRD patterns of the substrate materials.  $d_{100}(\text{COOH-SBA-15})=10.2$  nm and  $d_{100}(\text{SBA-15})=9.32$  nm. XRD measurements were performed using a Kratky compact small-angle system (M. Braun, Austria). The system is equipped with a position-sensitive detector (PSD 50m) consisting of 1024 channels of 55.5  $\mu\text{m}$  width each. A Seifert ID-300 X-ray generator, operating at a maximum intensity of 50kV and 40 mA, provided the Cu K $\alpha$  radiation at  $\lambda = 1.542\text{\AA}$ . A Ni filter was used to remove K $\beta$  radiation and a W filter protected the detector from the primary beam. The sample-to-detector distance was 277mm. The sample holder was kept under vacuum during the measurements in order to minimize the background scattering from air.

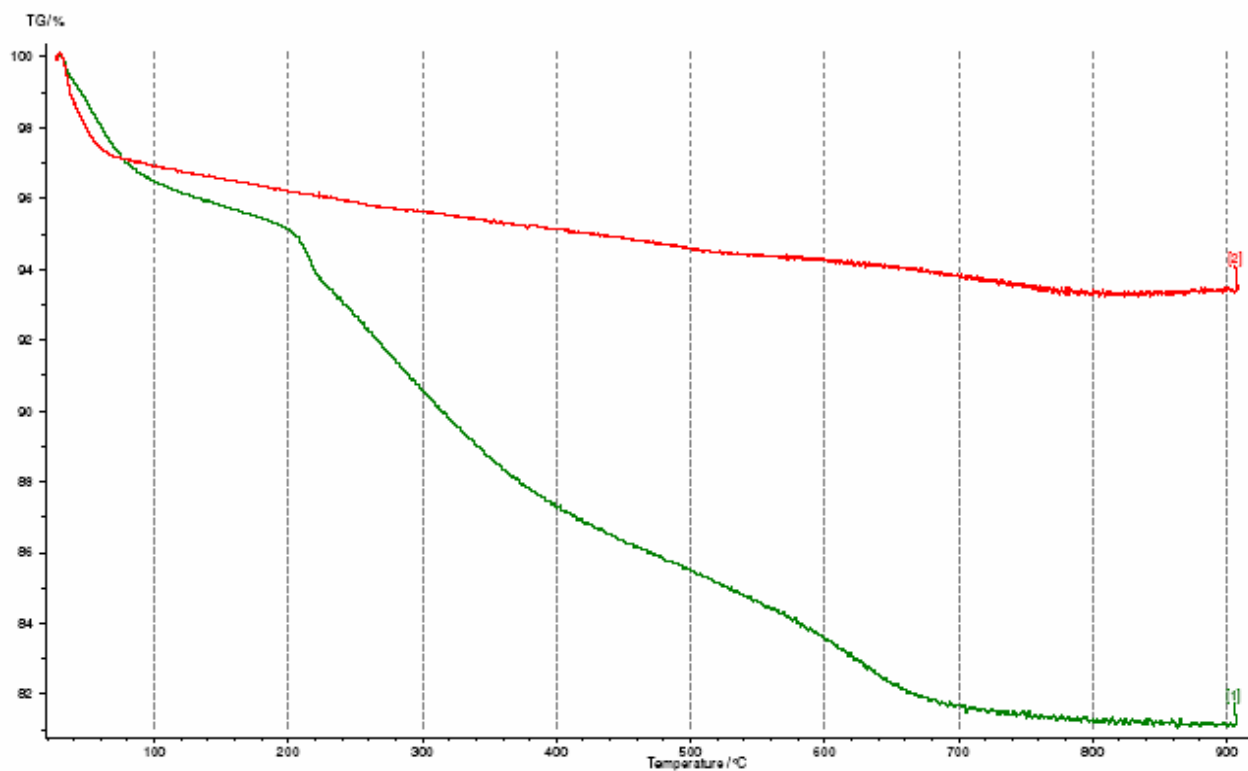

**Supplementary Fig. 2** TGA-curve for the purely siliceous SBA-15 substrate prior to (red) and after functionalization (green). Total mass loss = 14 wt%, of which PEI loss = 11 wt%

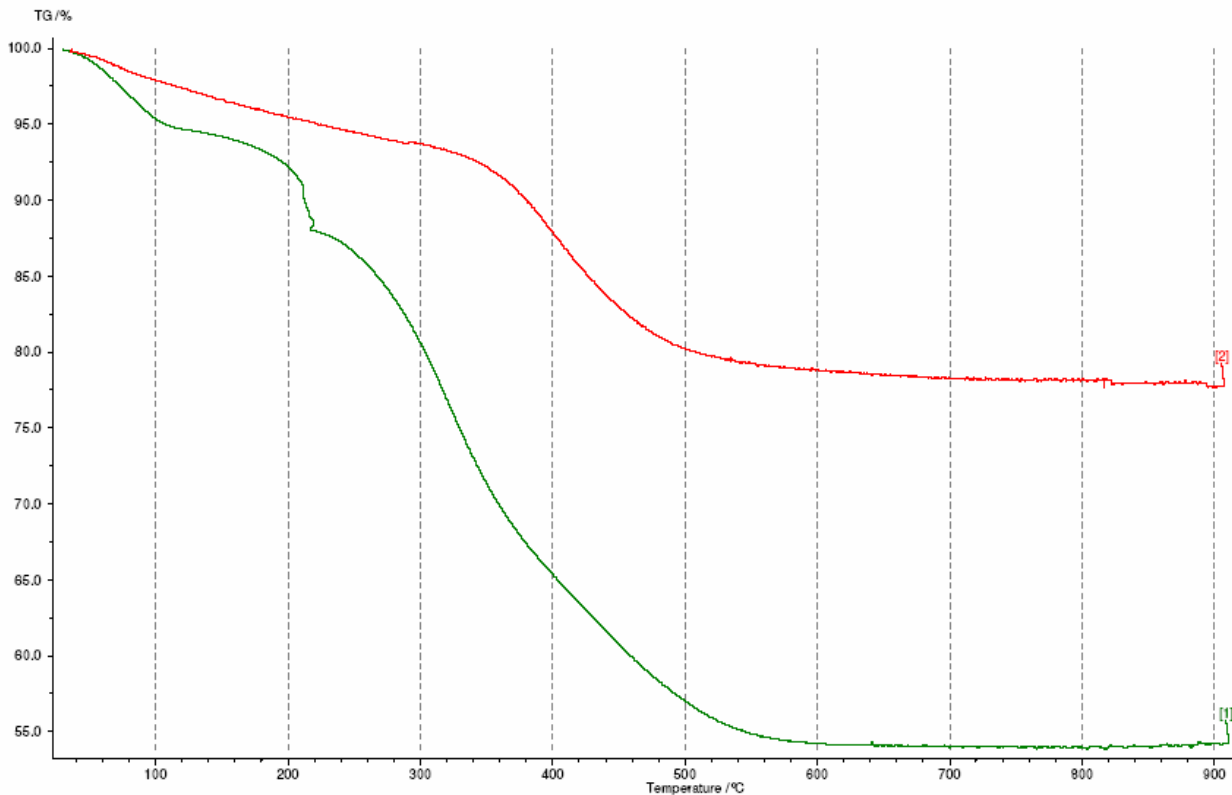

**Supplementary Fig. 3** TGA-curve for the COOH-SBA-15 substrate prior to (red) and after (green) functionalization. Total mass loss = 42 wt%, of which PEI loss = 28 wt%.
